# Supplementary material for: Thermochemistry of Solution, Solvation, and Hydrogen Bonding of Cyclic Amides in Proton Acceptor and Donor Solvents. Amide Cycle Size Effect
Source: PubMed Central journal article supplement (PMC7961564; doi:10.3390/molecules26051411), 2021-03-05
Supplement: molecules-26-01411-s001.pdf [file molecules-26-01411-s001.pdf]

SUPPLEMENTARY MATERIAL

**Thermochemistry of solution, solvation, and hydrogen bonding of cyclic amides in  
proton acceptor and donor solvents. Amide cycle size effect**

Ilnaz T. Rakipov\*, Artem A. Petrov, Aydar A. Akhmadiyarov, Artashes A. Khachatrian,  
Timur A. Mukhametzynov, Boris N. Solomonov.

*Department of Physical Chemistry, Kazan Federal University, Kremlevskaya 18, Kazan,*

*420008, Russia*

<sup>1</sup>To whom correspondence concerning the solution calorimetry experiments and hydrogen bond analysis should be addressed. E-mail: [ilnaz0805@gmail.com](mailto:ilnaz0805@gmail.com)

**Table 1.** The chemicals used in this study<sup>a</sup>.

| Compound                         | CAS number | Source         | Initial mass fraction purity | Purification method                      | Final mass fraction purity | Mass fraction of water <sup>b</sup> |
|----------------------------------|------------|----------------|------------------------------|------------------------------------------|----------------------------|-------------------------------------|
| Acetone (l)                      | 179124     | Sigma-Aldrich  | 0.995                        | Distillation                             | 0.997                      | 0.0003                              |
| Acetonitrile (l)                 | 75-05-8    | Sigma-Aldrich  | 0.999                        | Distillation                             | 0.998                      | 0.0002                              |
| Ethyl acetate (l)                | 141-78-6   | Sigma-Aldrich  | 0.995                        | Distillation                             | 0.996                      | 0.0004                              |
| Tetrahydrofuran (l)              | 109-99-9   | Sigma-Aldrich  | 0.99                         | Distillation                             | 0.997                      | 0.0004                              |
| Pyridine (l)                     | 110-86-1   | Sigma-Aldrich  | 0.99                         | Distillation                             | 0.997                      | 0.0003                              |
| 2 $\gamma$ -Butyrolactam (l)     | 616-45-5   | Sigma-Aldrich  | 0.99                         | Distillation<br>under reduce<br>pressure | 0.998                      | 0.0003                              |
| <i>N</i> -Methylbutyrolactam (l) | 872-50-4   | Sigma-Aldrich  | 0.99                         | Distillation<br>under reduce<br>pressure | 0.996                      | 0.0004                              |
| $\delta$ -Valerolactam (cr.)     | 675-20-7   | Acros Organics | 0.99                         | None                                     | -                          | 0.0008                              |
| <i>N</i> -Methylvalerolactam (l) | 931-20-4   | Sigma-Aldrich  | 0.99                         | None                                     | -                          | 0.0006                              |
| $\epsilon$ -Caprolactam (cr)     | 105-60-2   | Acros Organics | 0.99                         | None                                     | -                          | 0.0011                              |
| <i>N</i> -Methylcaprolactam (l)  | 2556-73-2  | TCI            | >0.97                        | None                                     | -                          | 0.0008                              |

<sup>a</sup> cr. – substances under standard conditions in the solid state, (l) – substances under standard conditions in the liquid state

<sup>b</sup> Determined by Karl Fischer titration.

They were purified according to the methods presented by work D.D. Perrin, W.L.F. Armarego, D.R. Perrin, Purification of Laboratory Chemicals, 1980.

**Table S2.** Solution enthalpies of  $\delta$ -Valerolactam, *N*-Methylvalerolactam and  $\epsilon$ -caprolactam, *N*-methyl- $\epsilon$ -caprolactam in proton acceptors solvents measured in this work at 298.15K and 0.1MPa<sup>a</sup>.

| Solute (A)                                                            | Solvent (S)          | m/mg <sup>b</sup> | b/mol·kg <sup>-1</sup> × 10 <sup>3c</sup> | $\Delta_{\text{soln}} H^{A/S}$ /<br>kJ·mol <sup>-1d</sup> |
|-----------------------------------------------------------------------|----------------------|-------------------|-------------------------------------------|-----------------------------------------------------------|
| $\delta$ -Valerolactam (cr)                                           | Acetone (l)          | 37.3              | 2.40                                      | 13.86                                                     |
| $\delta$ -Valerolactam (cr)                                           | Acetone (l)          | 38.3              | 4.86                                      | 14.03                                                     |
| $\delta$ -Valerolactam (cr)                                           | Acetone (l)          | 37.7              | 7.29                                      | 14.16                                                     |
| $\delta$ -Valerolactam (cr)                                           | Acetone (l)          | 37.2              | 9.68                                      | 13.57                                                     |
| $\Delta_{\text{soln}} H^{A/S} = 13.91 \pm 0.13$ kJ·mol <sup>-1e</sup> |                      |                   |                                           |                                                           |
| $\delta$ -Valerolactam (cr)                                           | Acetonitrile (l)     | 37.7              | 2.42                                      | 13.20                                                     |
| $\delta$ -Valerolactam (cr)                                           | Acetonitrile (l)     | 37.8              | 4.84                                      | 14.65                                                     |
| $\delta$ -Valerolactam (cr)                                           | Acetonitrile (l)     | 37.1              | 7.23                                      | 14.82                                                     |
| $\delta$ -Valerolactam (cr)                                           | Acetonitrile (l)     | 37.4              | 9.63                                      | 13.50                                                     |
| $\Delta_{\text{soln}} H^{A/S} = 14.04 \pm 0.41$ kJ·mol <sup>-1e</sup> |                      |                   |                                           |                                                           |
| $\delta$ -Valerolactam (cr)                                           | Ethyl acetate (l)    | 38.0              | 2.12                                      | 15.05                                                     |
| $\delta$ -Valerolactam (cr)                                           | Ethyl acetate (l)    | 40.6              | 4.40                                      | 14.44                                                     |
| $\delta$ -Valerolactam (cr)                                           | Ethyl acetate (l)    | 40.1              | 6.64                                      | 14.55                                                     |
| $\delta$ -Valerolactam (cr)                                           | Ethyl acetate (l)    | 40.7              | 8.91                                      | 15.20                                                     |
| $\Delta_{\text{soln}} H^{A/S} = 14.81 \pm 0.19$ kJ·mol <sup>-1e</sup> |                      |                   |                                           |                                                           |
| $\delta$ -Valerolactam (cr)                                           | Tetrahydrofurane (l) | 38.6              | 2.19                                      | 14.17                                                     |
| $\delta$ -Valerolactam (cr)                                           | Tetrahydrofurane (l) | 39.9              | 4.45                                      | 13.99                                                     |
| $\delta$ -Valerolactam (cr)                                           | Tetrahydrofurane (l) | 37.0              | 6.55                                      | 13.75                                                     |
| $\delta$ -Valerolactam (cr)                                           | Tetrahydrofurane (l) | 36.4              | 8.62                                      | 14.10                                                     |
| $\Delta_{\text{soln}} H^{A/S} = 14.00 \pm 0.09$ kJ·mol <sup>-1e</sup> |                      |                   |                                           |                                                           |
| $\delta$ -Valerolactam (cr)                                           | Pyridine (l)         | 39.4              | 2.02                                      | 8.11                                                      |
| $\delta$ -Valerolactam (cr)                                           | Pyridine (l)         | 37.0              | 3.92                                      | 7.89                                                      |
| $\delta$ -Valerolactam (cr)                                           | Pyridine (l)         | 41.0              | 6.03                                      | 8.18                                                      |
| $\delta$ -Valerolactam (cr)                                           | Pyridine (l)         | 37.3              | 7.95                                      | 7.88                                                      |
| $\Delta_{\text{soln}} H^{A/S} = 8.02 \pm 0.08$ kJ·mol <sup>-1e</sup>  |                      |                   |                                           |                                                           |
| <i>N</i> -Methylvalerolactam (l)                                      | Acetone (l)          | 36.4              | 2.05                                      | 1.46                                                      |
| <i>N</i> -Methylvalerolactam (l)                                      | Acetone (l)          | 34.3              | 3.98                                      | 1.55                                                      |
| <i>N</i> -Methylvalerolactam (l)                                      | Acetone (l)          | 33.3              | 5.86                                      | 1.54                                                      |
| <i>N</i> -Methylvalerolactam (l)                                      | Acetone (l)          | 32.7              | 7.70                                      | 1.43                                                      |
| $\Delta_{\text{soln}} H^{A/S} = 1.50 \pm 0.03$ kJ·mol <sup>-1e</sup>  |                      |                   |                                           |                                                           |
| <i>N</i> -Methylvalerolactam (l)                                      | Acetonitrile (l)     | 33.6              | 1.89                                      | 0.74                                                      |
| <i>N</i> -Methylvalerolactam (l)                                      | Acetonitrile (l)     | 33.0              | 3.74                                      | 0.91                                                      |
| <i>N</i> -Methylvalerolactam (l)                                      | Acetonitrile (l)     | 32.8              | 5.59                                      | 0.95                                                      |
| <i>N</i> -Methylvalerolactam (l)                                      | Acetonitrile (l)     | 36.6              | 7.65                                      | 0.78                                                      |
| $\Delta_{\text{soln}} H^{A/S} = 0.85 \pm 0.05$ kJ·mol <sup>-1e</sup>  |                      |                   |                                           |                                                           |
| <i>N</i> -Methylvalerolactam (l)                                      | Ethyl acetate (l)    | 34.8              | 1.70                                      | 2.01                                                      |

|                                                                                    |                      |      |      |       |
|------------------------------------------------------------------------------------|----------------------|------|------|-------|
| <i>N</i> -Methylvalerolactam (l)                                                   | Ethyl acetate (l)    | 34.6 | 3.40 | 2.52  |
| <i>N</i> -Methylvalerolactam (l)                                                   | Ethyl acetate (l)    | 33.7 | 5.05 | 2.44  |
| <i>N</i> -Methylvalerolactam (l)                                                   | Ethyl acetate (l)    | 35.2 | 6.77 | 2.25  |
| $\Delta_{\text{soln}} H^{A/S} = 2.31 \pm 0.11 \text{ kJ} \cdot \text{mol}^{-1} e$  |                      |      |      |       |
| <i>N</i> -Methylvalerolactam (l)                                                   | Tetrahydrofurane (l) | 34.1 | 1.69 | 1.42  |
| <i>N</i> -Methylvalerolactam (l)                                                   | Tetrahydrofurane (l) | 34.2 | 3.39 | 1.65  |
| <i>N</i> -Methylvalerolactam (l)                                                   | Tetrahydrofurane (l) | 34.1 | 5.09 | 1.83  |
| <i>N</i> -Methylvalerolactam (l)                                                   | Tetrahydrofurane (l) | 34.6 | 6.81 | 1.40  |
| $\Delta_{\text{soln}} H^{A/S} = 1.58 \pm 0.10 \text{ kJ} \cdot \text{mol}^{-1} e$  |                      |      |      |       |
| <i>N</i> -Methylvalerolactam (l)                                                   | Pyridine (l)         | 33.3 | 1.50 | -3.01 |
| <i>N</i> -Methylvalerolactam (l)                                                   | Pyridine (l)         | 35.7 | 3.10 | -2.88 |
| <i>N</i> -Methylvalerolactam (l)                                                   | Pyridine (l)         | 35.0 | 4.68 | -2.84 |
| <i>N</i> -Methylvalerolactam (l)                                                   | Pyridine (l)         | 36.2 | 6.31 | -2.88 |
| $\Delta_{\text{soln}} H^{A/S} = -2.90 \pm 0.04 \text{ kJ} \cdot \text{mol}^{-1} e$ |                      |      |      |       |
| $\epsilon$ -Caprolactam (cr)                                                       | Acetone (l)          | 33.4 | 1.88 | 19.88 |
| $\epsilon$ -Caprolactam (cr)                                                       | Acetone (l)          | 37.3 | 3.98 | 20.50 |
| $\epsilon$ -Caprolactam (cr)                                                       | Acetone (l)          | 35.2 | 5.97 | 19.99 |
| $\epsilon$ -Caprolactam (cr)                                                       | Acetone (l)          | 33.2 | 7.84 | 19.65 |
| $\Delta_{\text{soln}} H^{A/S} = 20.01 \pm 0.18 \text{ kJ} \cdot \text{mol}^{-1} e$ |                      |      |      |       |
| $\epsilon$ -Caprolactam (cr)                                                       | Acetonitrile (l)     | 37.5 | 2.11 | 20.29 |
| $\epsilon$ -Caprolactam (cr)                                                       | Acetonitrile (l)     | 34.9 | 4.07 | 20.28 |
| $\epsilon$ -Caprolactam (cr)                                                       | Acetonitrile (l)     | 36.0 | 6.09 | 20.44 |
| $\epsilon$ -Caprolactam (cr)                                                       | Acetonitrile (l)     | 36.9 | 8.17 | 20.45 |
| $\Delta_{\text{soln}} H^{A/S} = 20.37 \pm 0.05 \text{ kJ} \cdot \text{mol}^{-1} e$ |                      |      |      |       |
| $\epsilon$ -Caprolactam (cr)                                                       | Ethyl acetate (l)    | 37.7 | 1.85 | 21.07 |
| $\epsilon$ -Caprolactam (cr)                                                       | Ethyl acetate (l)    | 36.6 | 3.64 | 20.85 |
| $\epsilon$ -Caprolactam (cr)                                                       | Ethyl acetate (l)    | 35.6 | 5.38 | 20.70 |
| $\epsilon$ -Caprolactam (cr)                                                       | Ethyl acetate (l)    | 37.1 | 7.20 | 21.04 |
| $\Delta_{\text{soln}} H^{A/S} = 20.92 \pm 0.09 \text{ kJ} \cdot \text{mol}^{-1} e$ |                      |      |      |       |
| $\epsilon$ -Caprolactam (cr)                                                       | Tetrahydrofurane (l) | 34.0 | 1.69 | 18.94 |
| $\epsilon$ -Caprolactam (cr)                                                       | Tetrahydrofurane (l) | 36.4 | 3.50 | 19.44 |
| $\epsilon$ -Caprolactam (cr)                                                       | Tetrahydrofurane (l) | 35.7 | 5.27 | 19.42 |
| $\epsilon$ -Caprolactam (cr)                                                       | Tetrahydrofurane (l) | 36.1 | 7.07 | 18.92 |
| $\Delta_{\text{soln}} H^{A/S} = 19.18 \pm 0.14 \text{ kJ} \cdot \text{mol}^{-1} e$ |                      |      |      |       |
| $\epsilon$ -Caprolactam (cr)                                                       | Pyridine (l)         | 36.8 | 1.66 | 13.68 |
| $\epsilon$ -Caprolactam (cr)                                                       | Pyridine (l)         | 36.3 | 3.29 | 14.01 |
| $\epsilon$ -Caprolactam (cr)                                                       | Pyridine (l)         | 33.3 | 4.79 | 13.77 |
| $\epsilon$ -Caprolactam (cr)                                                       | Pyridine (l)         | 33.9 | 6.31 | 13.99 |
| $\Delta_{\text{soln}} H^{A/S} = 13.86 \pm 0.08 \text{ kJ} \cdot \text{mol}^{-1} e$ |                      |      |      |       |
| <i>N</i> -Methylcaprolactam (l)                                                    | Acetone (l)          | 36.4 | 1.83 | 0.99  |
| <i>N</i> -Methylcaprolactam (l)                                                    | Acetone (l)          | 32.7 | 3.47 | 1.07  |
| <i>N</i> -Methylcaprolactam (l)                                                    | Acetone (l)          | 35.7 | 5.26 | 1.00  |

|                                                                                             |                      |      |      |       |
|---------------------------------------------------------------------------------------------|----------------------|------|------|-------|
| N-Methylcaprolactam (l)                                                                     | Acetone (l)          | 35.9 | 7.06 | 0.99  |
| $\Delta_{\text{soln}} H^{A/S} = 1.01 \pm 0.02 \text{ kJ} \cdot \text{mol}^{-1} \text{ }^e$  |                      |      |      |       |
| N-Methylcaprolactam (l)                                                                     | Acetonitrile (l)     | 33.5 | 1.68 | 0.39  |
| N-Methylcaprolactam (l)                                                                     | Acetonitrile (l)     | 35.6 | 3.46 | 0.50  |
| N-Methylcaprolactam (l)                                                                     | Acetonitrile (l)     | 33.2 | 5.12 | 0.42  |
| N-Methylcaprolactam (l)                                                                     | Acetonitrile (l)     | 35.3 | 6.88 | 0.45  |
| $\Delta_{\text{soln}} H^{A/S} = 0.44 \pm 0.02 \text{ kJ} \cdot \text{mol}^{-1} \text{ }^e$  |                      |      |      |       |
| N-Methylcaprolactam (l)                                                                     | Ethyl acetate (l)    | 35.5 | 1.55 | 1.65  |
| N-Methylcaprolactam (l)                                                                     | Ethyl acetate (l)    | 33.9 | 3.02 | 1.55  |
| N-Methylcaprolactam (l)                                                                     | Ethyl acetate (l)    | 32.8 | 4.45 | 1.56  |
| N-Methylcaprolactam (l)                                                                     | Ethyl acetate (l)    | 34.3 | 5.95 | 1.63  |
| $\Delta_{\text{soln}} H^{A/S} = 1.60 \pm 0.02 \text{ kJ} \cdot \text{mol}^{-1} \text{ }^e$  |                      |      |      |       |
| N-Methylcaprolactam (l)                                                                     | Tetrahydrofurane (l) | 35.7 | 1.58 | 1.33  |
| N-Methylcaprolactam (l)                                                                     | Tetrahydrofurane (l) | 34.7 | 3.11 | 1.41  |
| N-Methylcaprolactam (l)                                                                     | Tetrahydrofurane (l) | 32.9 | 4.57 | 1.34  |
| N-Methylcaprolactam (l)                                                                     | Tetrahydrofurane (l) | 35.8 | 6.15 | 1.41  |
| $\Delta_{\text{soln}} H^{A/S} = 1.37 \pm 0.02 \text{ kJ} \cdot \text{mol}^{-1} \text{ }^e$  |                      |      |      |       |
| N-Methylcaprolactam (l)                                                                     | Pyridine (l)         | 36.3 | 1.45 | -2.50 |
| N-Methylcaprolactam (l)                                                                     | Pyridine (l)         | 34.0 | 2.81 | -2.50 |
| N-Methylcaprolactam (l)                                                                     | Pyridine (l)         | 33.5 | 4.16 | -2.54 |
| N-Methylcaprolactam (l)                                                                     | Pyridine (l)         | 33.3 | 5.49 | -2.60 |
| $\Delta_{\text{soln}} H^{A/S} = -2.54 \pm 0.02 \text{ kJ} \cdot \text{mol}^{-1} \text{ }^e$ |                      |      |      |       |

<sup>a</sup> Standard uncertainties  $u$  are  $u(T) = 0.01 \text{ K}$ .  $u(p) = 10 \text{ kPa}$ . Cr. – substances under standard conditions in the solid state, (l) – substances under standard conditions in the liquid state

<sup>b</sup> Mass of solute sample which was added in each dissolution experiment ( $u(m) = 0.1 \text{ mg}$ )

<sup>c</sup> Molality of solute in solution after experiments ( $u(b) = 0.00005$ )

<sup>d</sup> Enthalpy of solution of each experiment

<sup>e</sup> Average enthalpy of solution. Uncertainty is calculated as a standard deviation of the mean

**Table S3.** Solution enthalpies of N-methylbutyrolactam, N-methylvalerolactam, N-Methyl- $\epsilon$ -caprolactam in proton acceptors solvents measured in this work at 298.15K and 0.1MPa<sup>a</sup>

| Solute (A)                                                                                   | Solvent (S)         | m/mg <sup>b</sup> | b/mol·kg <sup>-1</sup> × 10 <sup>3</sup> <sup>c</sup> | $\Delta_{\text{soln}} H^{A/S} /$<br>kJ·mol <sup>-1</sup> <sup>d</sup> |
|----------------------------------------------------------------------------------------------|---------------------|-------------------|-------------------------------------------------------|-----------------------------------------------------------------------|
| N-Methylbutyrolactam (l)                                                                     | Dichloromethane (l) | 36.3              | 1.38                                                  | -8.49                                                                 |
| N-Methylbutyrolactam (l)                                                                     | Dichloromethane (l) | 34.4              | 2.68                                                  | -8.64                                                                 |
| N-Methylbutyrolactam (l)                                                                     | Dichloromethane (l) | 35.3              | 4.02                                                  | -8.67                                                                 |
| N-Methylbutyrolactam (l)                                                                     | Dichloromethane (l) | 34.2              | 5.31                                                  | -8.45                                                                 |
| $\Delta_{\text{soln}} H^{A/S} = -8.56 \pm 0.05 \text{ kJ} \cdot \text{mol}^{-1} \text{ }^e$  |                     |                   |                                                       |                                                                       |
| N-Methylbutyrolactam (l)                                                                     | Chloroform (l)      | 34.1              | 1.16                                                  | -19.22                                                                |
| N-Methylbutyrolactam (l)                                                                     | Chloroform (l)      | 37.4              | 2.42                                                  | -18.94                                                                |
| N-Methylbutyrolactam (l)                                                                     | Chloroform (l)      | 37.6              | 3.69                                                  | -19.22                                                                |
| N-Methylbutyrolactam (l)                                                                     | Chloroform (l)      | 36.3              | 4.92                                                  | -18.86                                                                |
| $\Delta_{\text{soln}} H^{A/S} = -19.06 \pm 0.09 \text{ kJ} \cdot \text{mol}^{-1} \text{ }^e$ |                     |                   |                                                       |                                                                       |

|                                                                                              |                     |      |      |        |
|----------------------------------------------------------------------------------------------|---------------------|------|------|--------|
| <i>N</i> -Methylvalerolactam (l)                                                             | Dichloromethane (l) | 35.1 | 1.17 | -8.45  |
| <i>N</i> -Methylvalerolactam (l)                                                             | Dichloromethane (l) | 35.6 | 2.35 | -8.34  |
| <i>N</i> -Methylvalerolactam (l)                                                             | Dichloromethane (l) | 35.8 | 3.54 | -8.27  |
| <i>N</i> -Methylvalerolactam (l)                                                             | Dichloromethane (l) | 35.5 | 4.72 | -8.24  |
| $\Delta_{\text{soln}} H^{A/S} = -8.33 \pm 0.05 \text{ kJ} \cdot \text{mol}^{-1} \text{ }^e$  |                     |      |      |        |
| <i>N</i> -Methylvalerolactam (l)                                                             | Chloroform (l)      | 36.4 | 1.08 | -19.18 |
| <i>N</i> -Methylvalerolactam (l)                                                             | Chloroform (l)      | 36.1 | 2.15 | -19.39 |
| <i>N</i> -Methylvalerolactam (l)                                                             | Chloroform (l)      | 36.3 | 3.23 | -19.16 |
| <i>N</i> -Methylvalerolactam (l)                                                             | Chloroform (l)      | 35.6 | 4.28 | -19.41 |
| $\Delta_{\text{soln}} H^{A/S} = -19.29 \pm 0.07 \text{ kJ} \cdot \text{mol}^{-1} \text{ }^e$ |                     |      |      |        |
| <i>N</i> -Methylcaprolactam (l)                                                              | Dichloromethane (l) | 35.6 | 1.05 | -7.21  |
| <i>N</i> -Methylcaprolactam (l)                                                              | Dichloromethane (l) | 33.8 | 2.05 | -7.36  |
| <i>N</i> -Methylcaprolactam (l)                                                              | Dichloromethane (l) | 36.2 | 3.12 | -7.22  |
| <i>N</i> -Methylcaprolactam (l)                                                              | Dichloromethane (l) | 35.9 | 4.18 | -7.33  |
| $\Delta_{\text{soln}} H^{A/S} = -7.28 \pm 0.04 \text{ kJ} \cdot \text{mol}^{-1} \text{ }^e$  |                     |      |      |        |
| <i>N</i> -Methylcaprolactam (l)                                                              | Chloroform (l)      | 35.4 | 0.93 | 18.07  |
| <i>N</i> -Methylcaprolactam (l)                                                              | Chloroform (l)      | 34.0 | 1.83 | 17.86  |
| <i>N</i> -Methylcaprolactam (l)                                                              | Chloroform (l)      | 32.8 | 2.70 | 18.06  |
| <i>N</i> -Methylcaprolactam (l)                                                              | Chloroform (l)      | 35.9 | 3.64 | 17.90  |
| $\Delta_{\text{soln}} H^{A/S} = -17.97 \pm 0.05 \text{ kJ} \cdot \text{mol}^{-1} \text{ }^e$ |                     |      |      |        |

<sup>a</sup> Standard uncertainties  $u$  are  $u(T) = 0.01 \text{ K}$ ,  $u(p) = 10 \text{ kPa}$ , (l) – substances under standard conditions in the liquid state

<sup>b</sup> Mass of solute sample which was added in each dissolution experiment ( $u(m) = 0.1 \text{ mg}$ )

<sup>c</sup> Molality of solute in solution after experiments ( $u(b) = 0.00005$ )

<sup>d</sup> Enthalpy of solution of each experiment

<sup>e</sup> Average enthalpy of solution. Uncertainty is calculated as a standard deviation of the mean

**Table S 4** Characteristic volumes of amides ( $V_X^A \times 10^{-2} / \text{cm}^3 \cdot \text{mol}^{-1}$ ), solution enthalpies of cyclic amides in benzene ( $\Delta_{\text{soln}} H^{A/R} / \text{kJ} \cdot \text{mol}^{-1}$ ), cyclohexane ( $\Delta_{\text{soln}} H^{A/C_6H_{12}} / \text{kJ} \cdot \text{mol}^{-1}$ ) measured in this work at 298.15 K and 0.1 MPa<sup>a</sup>.

| Cyclic amides (A)            | $V_X^A \times 10^{-2}$ | $\Delta_{\text{soln}} H^{A/R}$ | $\Delta_{\text{soln}} H^{A/C_6H_{12}}$ |
|------------------------------|------------------------|--------------------------------|----------------------------------------|
| <i>N</i> -Methylbutyrolactam | 0.8200                 | -1.69±0.02 <sup>b</sup>        | 12.30±0.10 <sup>b</sup>                |
| <i>N</i> -Methylvalerolactam | 0.9609                 | -1.68±0.03 <sup>c</sup>        | 12.12±0.05 <sup>c</sup>                |
| <i>N</i> -Methylcaprolactam  | 1.1018                 | -1.09±0.04 <sup>c</sup>        | 11.02±0.03 <sup>c</sup>                |

<sup>a</sup> Standard uncertainties  $u$  are  $u(T) = 0.01 \text{ K}$ ,  $u(p) = 10 \text{ kPa}$ . <sup>b</sup>

<sup>b</sup> taken from I.T. Rakipov, A.N. Sabirzyanov, A.A. Petrov, A.A. Akhmediayrov, M.A. Varfolomeev, B.N. Solomonov, Thermochemistry of hydrogen bonding of linear and cyclic amides in proton acceptors media, Thermochim. Acta, 652 (2017) 34-38.

<sup>c</sup> Enthalpies of solution measured in this work

**Table S5.** Enthalpies of vaporization and sublimation of cyclic amides taken from literature at 298.15 K and 0.1 MPa, kJ·mol<sup>-1</sup>.

| Solute (A)                   | $\Delta_{\text{ev}}H^{A_i/S}$ | Ref.           |
|------------------------------|-------------------------------|----------------|
| $\gamma$ -Butyrolactam       | <b>73.7±1.3</b>               | [1]            |
| <i>N</i> -Methylbutyrolactam | 56.9                          | [2]            |
|                              | 55.8                          | [3]            |
|                              | 61.9                          | [4]            |
|                              | 57.7                          | [5]            |
|                              | 56.1                          | [6]            |
|                              | 56.8                          | [7]            |
|                              | 55.9                          | [7]            |
|                              | 55.1                          | [8]            |
|                              | 56.1                          | [9]            |
|                              | 54.3                          | [8]            |
|                              | 55.2                          | [10]           |
| 54.9                         | [11]                          |                |
|                              | <b>56.4±0.6<sup>a</sup></b>   | <b>average</b> |
| $\delta$ -Valerolactam       | <b>78.7±1.3</b>               | [12]           |
| <i>N</i> -Methylvalerolactam | 60.3                          | [12]           |
|                              | 59.5                          | [8]            |
|                              | <b>59.9±0.4<sup>a</sup></b>   | <b>average</b> |
| $\epsilon$ -Caprolactam      | 86.8                          | [13]           |
|                              | 87.5                          | [13]           |
|                              | 90.3                          | [14]           |
|                              | 87.3                          | [14]           |
|                              | 87.3                          | [14]           |
|                              | 88.3                          | [15]           |
|                              | <b>87.9±0.6<sup>a</sup></b>   | <b>average</b> |
| <i>N</i> -Methylcaprolactam  | <b>63.0±0.2</b>               | [3]            |

<sup>a</sup>Average enthalpy of solution. Uncertainty is calculated as a standard deviation of the mean

#### References

- [1] K.M. Morgan, D.A. Kopp, Solvent effects on the stability of simple secondary amides, *J. Chem. Soc., Perkin Trans. 2*, (1998) 2759-2763.
- [2] K.R. Reddy, D.B.K. Kumar, G.S. Rao, P.B.S. Sri, C. Rambabu, Vapor-liquid equilibria and excess molar volumes of *N*-methyl-2-pyrrolidone with 2-alkoxyethanols, *Fluid Phase Equilib.*, 336 (2012) 52-58.
- [3] M. Palczewska-Tulińska, P. Oracz, Vapor pressures of 1-methyl-2-pyrrolidone, 1-methyl-azepan-2-one, and 1,2-epoxy-3-chloropropane, *J. Chem. Eng. Data*, 52 (2007) 2468-2471.
- [4] K. Chyliński, Z. Fraś, S.K. Malanowski, Vapor-liquid equilibrium for propylene glycol + 2-(2-hexyloxyethoxy)ethanol and 1-methyl-2-pyrrolidone + 1-methoxypropan-2-ol, *J. Chem. Eng. Data*, 49 (2004) 18-23.
- [5] B. Blanco, S. Beltrán, J.L. Cabezas, J. Coca, Phase equilibria of binary systems formed by hydrocarbons from petroleum fractions and the solvents *N*-methylpyrrolidone and *N,N*-dimethylformamide. 1. Isobaric vapor-liquid equilibria, *J. Chem. Eng. Data*, 42 (1997) 938-942.

- [6] J. Linek, I. Wichterle, K.N. Marsh, Vapor-liquid equilibria for N-methyl-2-pyrrolidone + benzene, +toluene, +heptane, and +methylcyclohexane, *J. Chem. Eng. Data*, 41 (1996) 1212-1218.
- [7] P. Kneisl, J.W. Zondlo, Vapor Pressure, Liquid Density, and the Latent Heat of Vaporization as Functions of Temperature for Four Dipolar Aprotic Solvents, *J. Chem. Eng. Data*, 32 (1987) 11-13.
- [8] R.M. Stephenson, S. Malanowski, *Handbook of the Thermodynamics of Organic Compounds*, Elsevier, New York,, 1987.
- [9] V.I. Bludilina, A.K. Baev, V.K. Matveev, I.L. Gaidym, E.I. Shcherbina, *Zh. Fiz. Khim*, 53 (1979) 1052-1053.
- [10] T.E. Daubert, D.R. P., *Physical and Thermodynamic Properties of Pure Chemicals*, Taylor & Francis, London, 1989.
- [11] W.V. Steele, R.D. Chirico, A. Nguyen, I.A. Hossenlopp, N.K. Smith, Determination of ideal-gas enthalpies of formation for key compounds, in: *AIChE Symp. Ser.*, 1990, pp. 138-154.
- [12] M.A.V. Ribeiro Da Silva, J.I.T.A. Cabral, Thermochemistry of some derivatives of 2- and 4-piperidone, *J. Chem. Eng. Data*, 51 (2006) 1556-1561.
- [13] D.H. Zaitsau, Y.U. Paulechka, G.J. Kabo, A.N. Kolpikau, V.N. Emel'yanenko, A. Heintz, S.P. Verevkin, Thermodynamics of the sublimation and of the vaporization of  $\epsilon$ -caprolactam, *J. Chem. Eng. Data*, 51 (2006) 130-135.
- [14] G.J. Kabo, A.A. Kozyro, V.S. Krouk, V.M. Sevruk, I.A. Yursha, V.V. Simirsky, V.I. Gogolinsky, Thermodynamic properties of 6-aminoheptanoic lactam ( $\epsilon$ -caprolactam), *J. Chem. Thermodyn.*, 24 (1992) 1-13.
- [15] V.L.S. Freitas, M.D.M.C. Ribeiro da Silva, Thermodynamic properties of  $\epsilon$ -caprolactam and  $\epsilon$ -caprothiolactam, *J. Chem. Thermodyn.*, 132 (2019) 451-460.

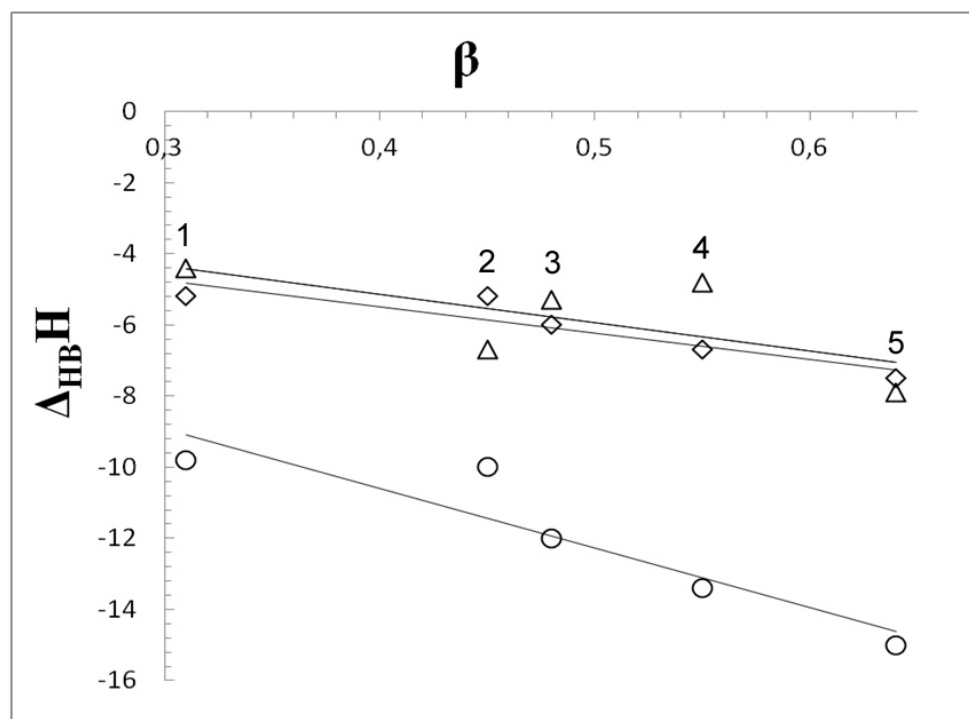

Fig. S1. Comparison of parameter  $\beta$  and enthalpies of hydrogen bond of cyclic amides in proton acceptor solvents:  $\circ$  -  $\gamma$ -butyrolactam,  $\square$  -  $\delta$ -valerolactam,  $\triangle$  -  $\epsilon$ -caprolactam: (1- acetonitrile, 2-ethyl acetate, 3 - acetone, 4- tetrahydrofurane, 5- pyridine)
